# Supplementary material
Source: Springer Nature journal article supplement (https://www.springermedizin.de/resource/supplementary/13063_2009_454_MOESM3_ESM.pdf/9618252)

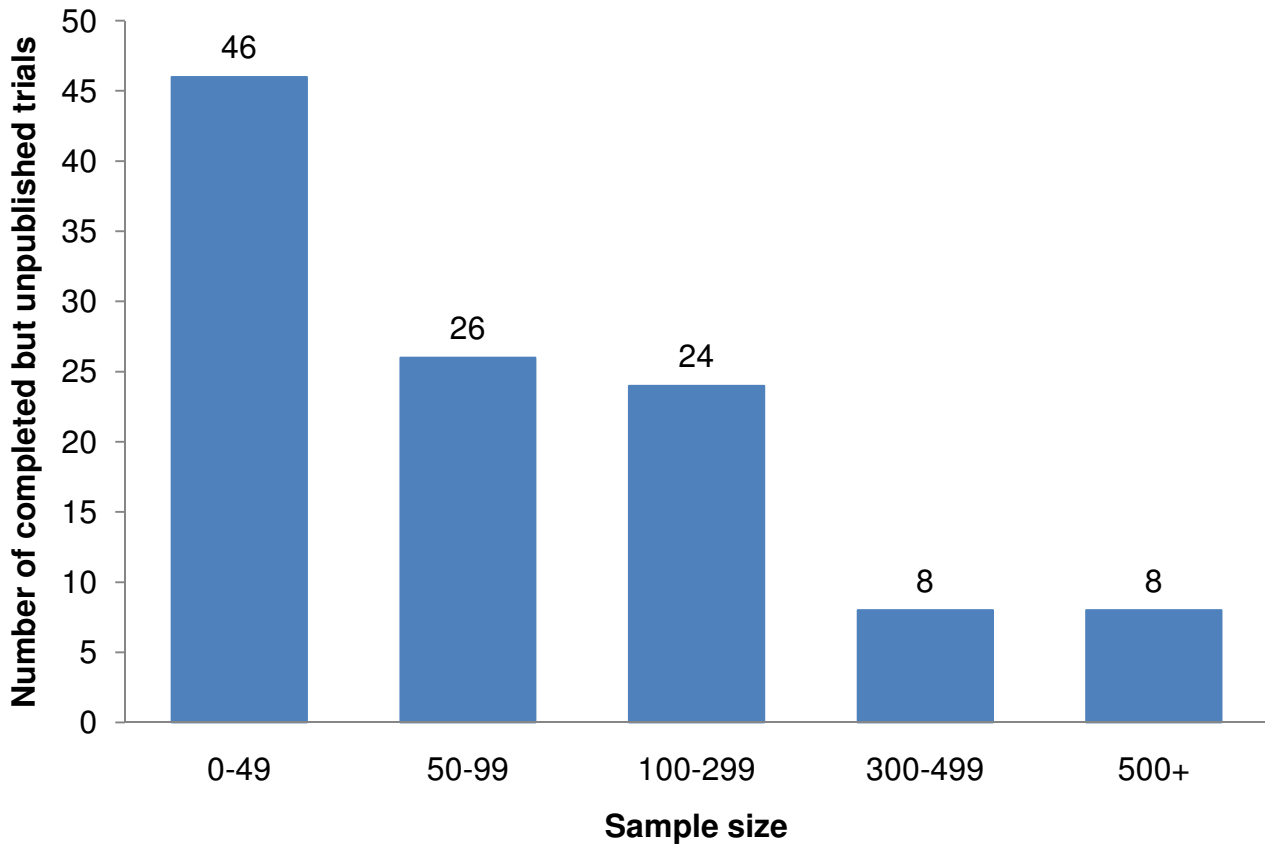

Supplement: MOESM3 [file 9618252]
